# Supplementary material
Source: MDPI journal article supplement (https://www.mdpi.com/1424-2818/15/11/1112)
Supplement: s1 [file s1]

Archive with 9 entries (9 files):
- Figure S1.tiff
- Figure S2.tiff
- Figure S3.tiff
- Figure S4.tiff
- Figure S5.tiff
- Figure S6.tiff
- Figure S7.tiff
- Figure S8.tiff
- supplementary_figure_text.pdf
