# Supplementary material
Source: MDPI journal article supplement (https://www.mdpi.com/1424-2818/15/11/1112)
Supplement: s1 [file s1]

**Figure S1.** Seasonal deep station density of *Daphnia mendotae* compared to *Bythotrephes longimanus* and *Cercopagis pengoi* in all study years. The black arrow denotes the time when a Cercopagidae was first detected (*B. longimanus* 2014, *C. pengoi* 2018).

**Figure S2.** Seasonal deep station density of *Ceriodaphnia* spp. compared to *Bythotrephes longimanus* and *Cercopagis pengoi* in all study years. The black arrow denotes the time when a Cercopagidae was first detected (*B. longimanus* 2014, *C. pengoi* 2018).

**Figure S3.** Seasonal deep station density of *Bosmina longirostris* compared to *Bythotrephes longimanus* and *Cercopagis pengoi* in all study years. The black arrow denotes the time when a Cercopagidae was first detected (*B. longimanus* 2014, *C. pengoi* 2018).

**Figure S4.** Seasonal deep station density of *Eubosmina coregoni* compared to *Bythotrephes longimanus* and *Cercopagis pengoi* in all study years. The black arrow denotes the time when a Cercopagidae was first detected (*B. longimanus* 2014, *C. pengoi* 2018).

**Figure S5.** Seasonal deep station density of *Mesocyclops edax* compared to *Bythotrephes longimanus* and *Cercopagis pengoi* in all study years. The black arrow denotes the time when a Cercopagidae was first detected (*B. longimanus* 2014, *C. pengoi* 2018).

**Figure S6.** Seasonal deep station density of *Tropocyclops prasinus mexicanus* compared to *Bythotrephes longimanus* and *Cercopagis pengoi* in all study years. The black arrow denotes the time when a Cercopagidae was first detected (*B. longimanus* 2014, *C. pengoi* 2018).

**Figure S7.** Seasonal deep station density of Diaptomidae calanoid copepods compared to *Bythotrephes longimanus* and *Cercopagis pengoi* in all study years. The black arrow denotes the time when a Cercopagidae was first detected (*B. longimanus* 2014, *C. pengoi* 2018).

**Figure S8.** Seasonal deep station density of *Asplanchna* spp. compared to *Bythotrephes longimanus* and *Cercopagis pengoi* in all study years. The black arrow denotes the time when a Cercopagidae was first detected (*B. longimanus* 2014, *C. pengoi* 2018).
