# Supplementary material
Source: MDPI journal article supplement (https://www.mdpi.com/1424-2818/15/11/1112)

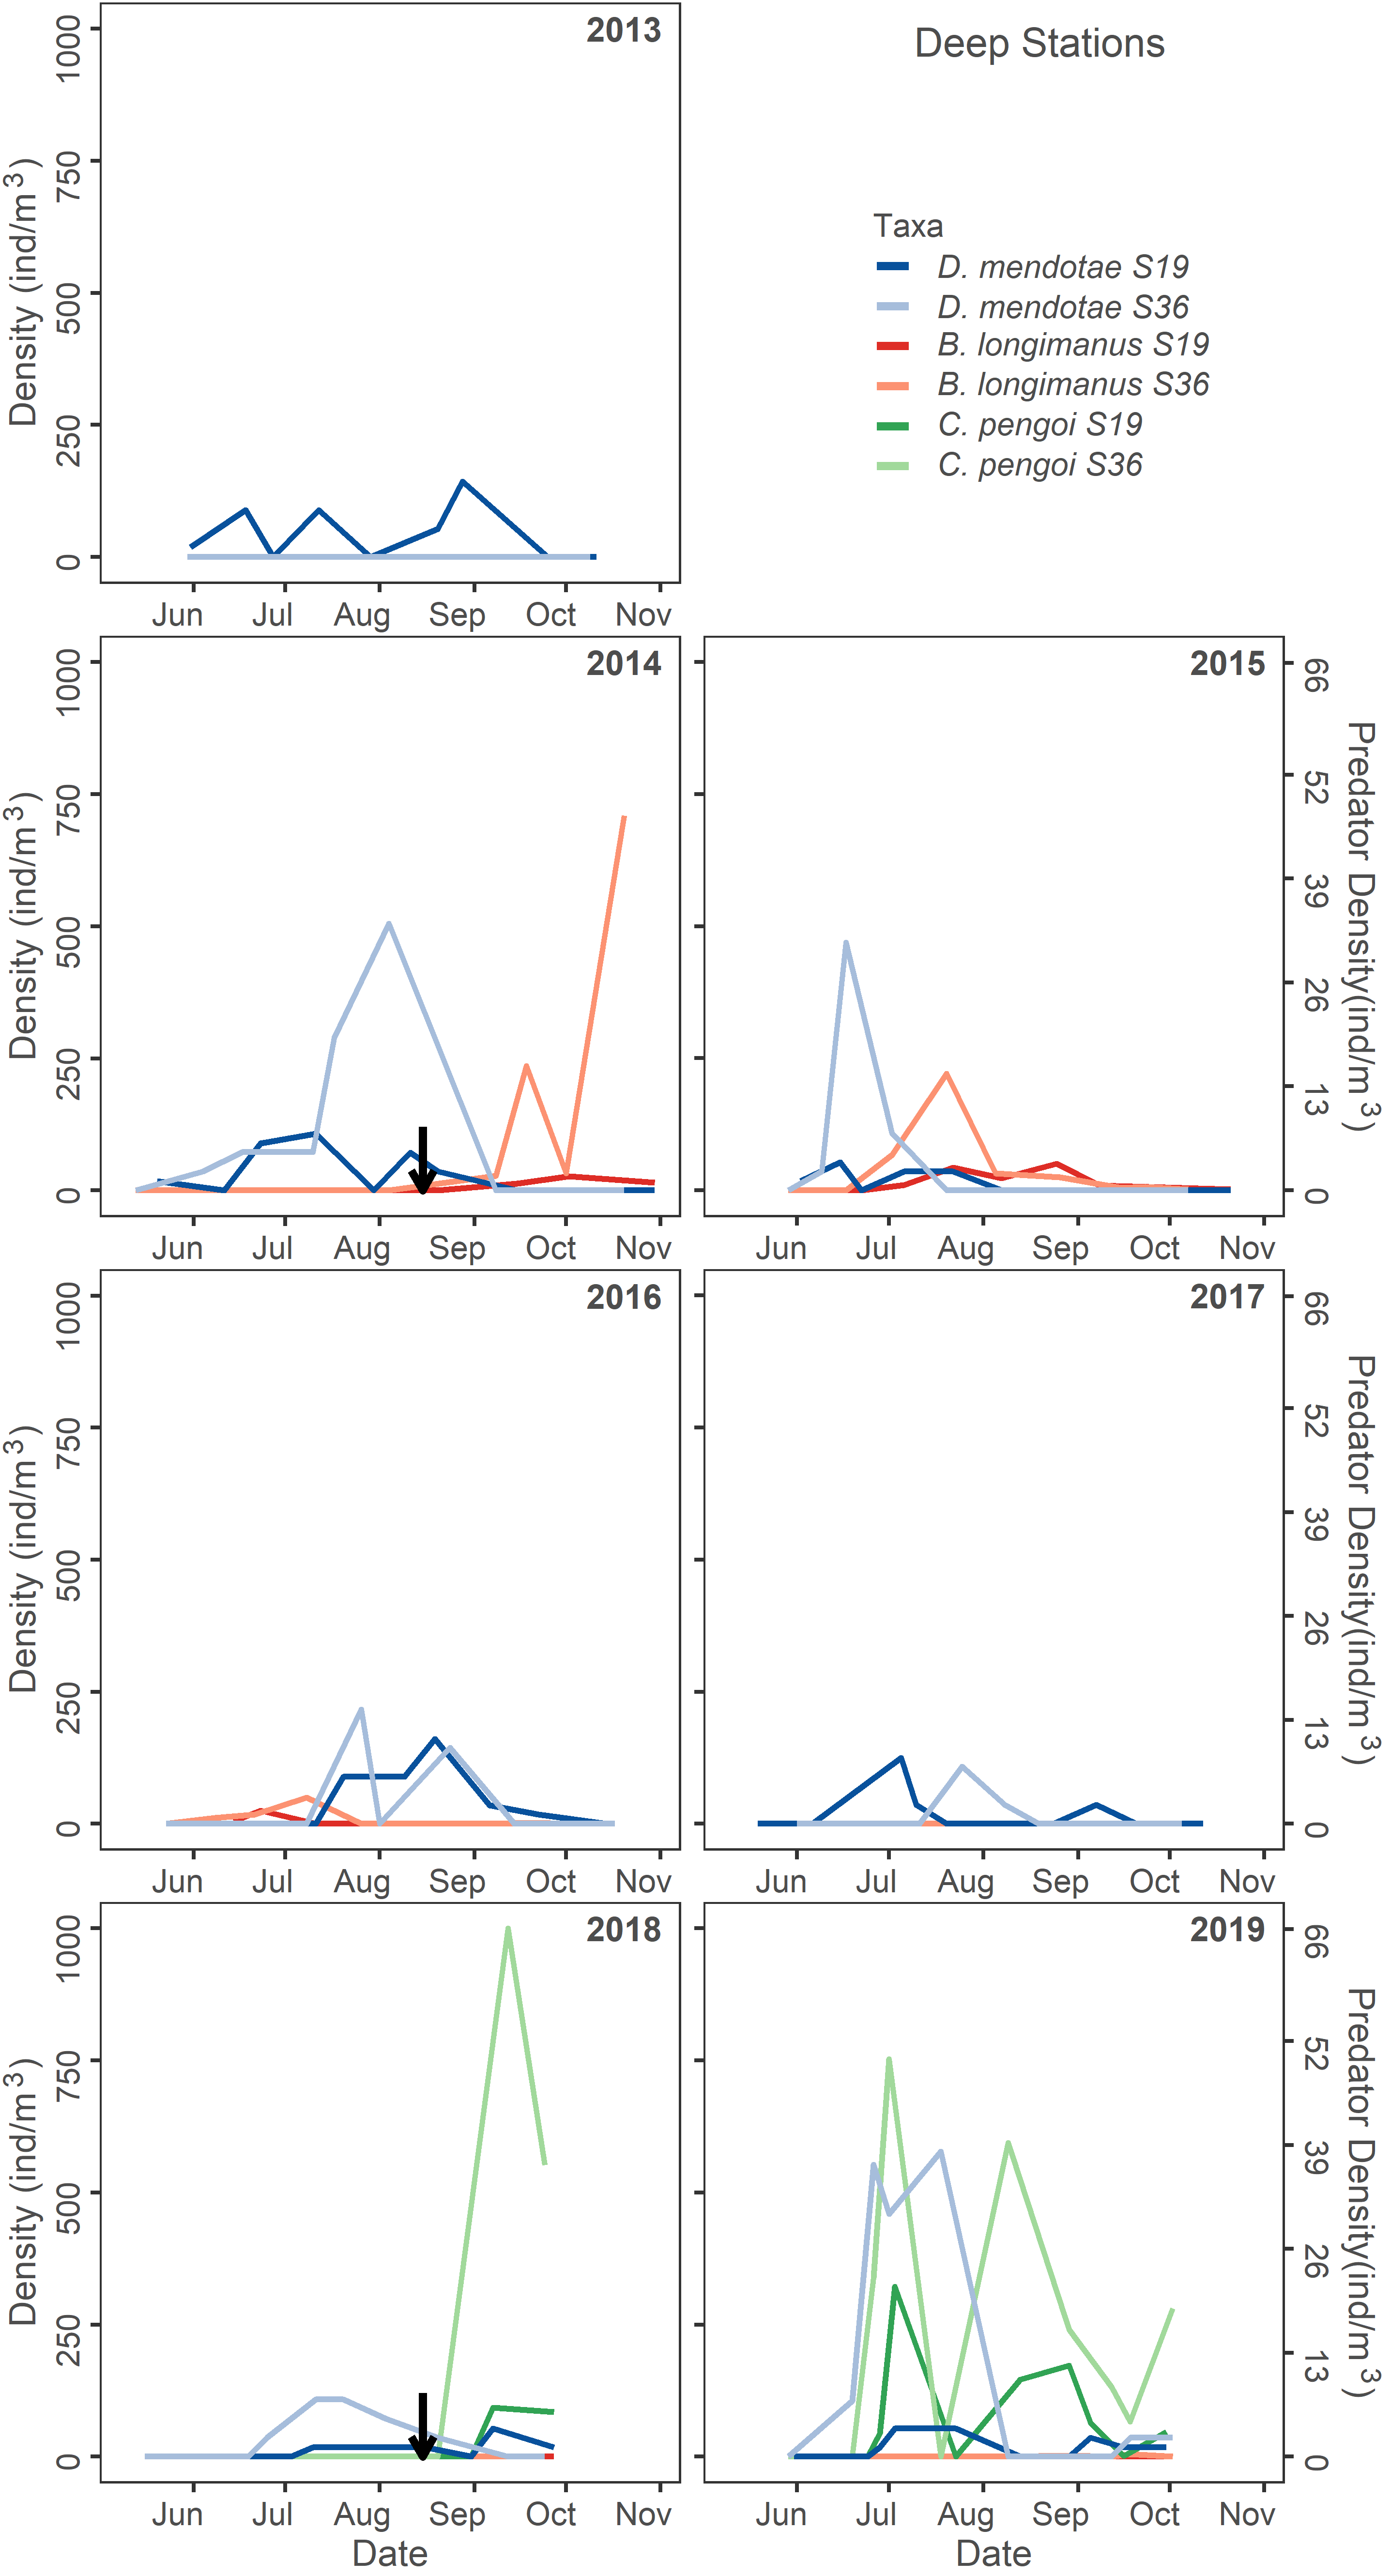

Supplement: s1 [file s1 › Figure S1.tiff]

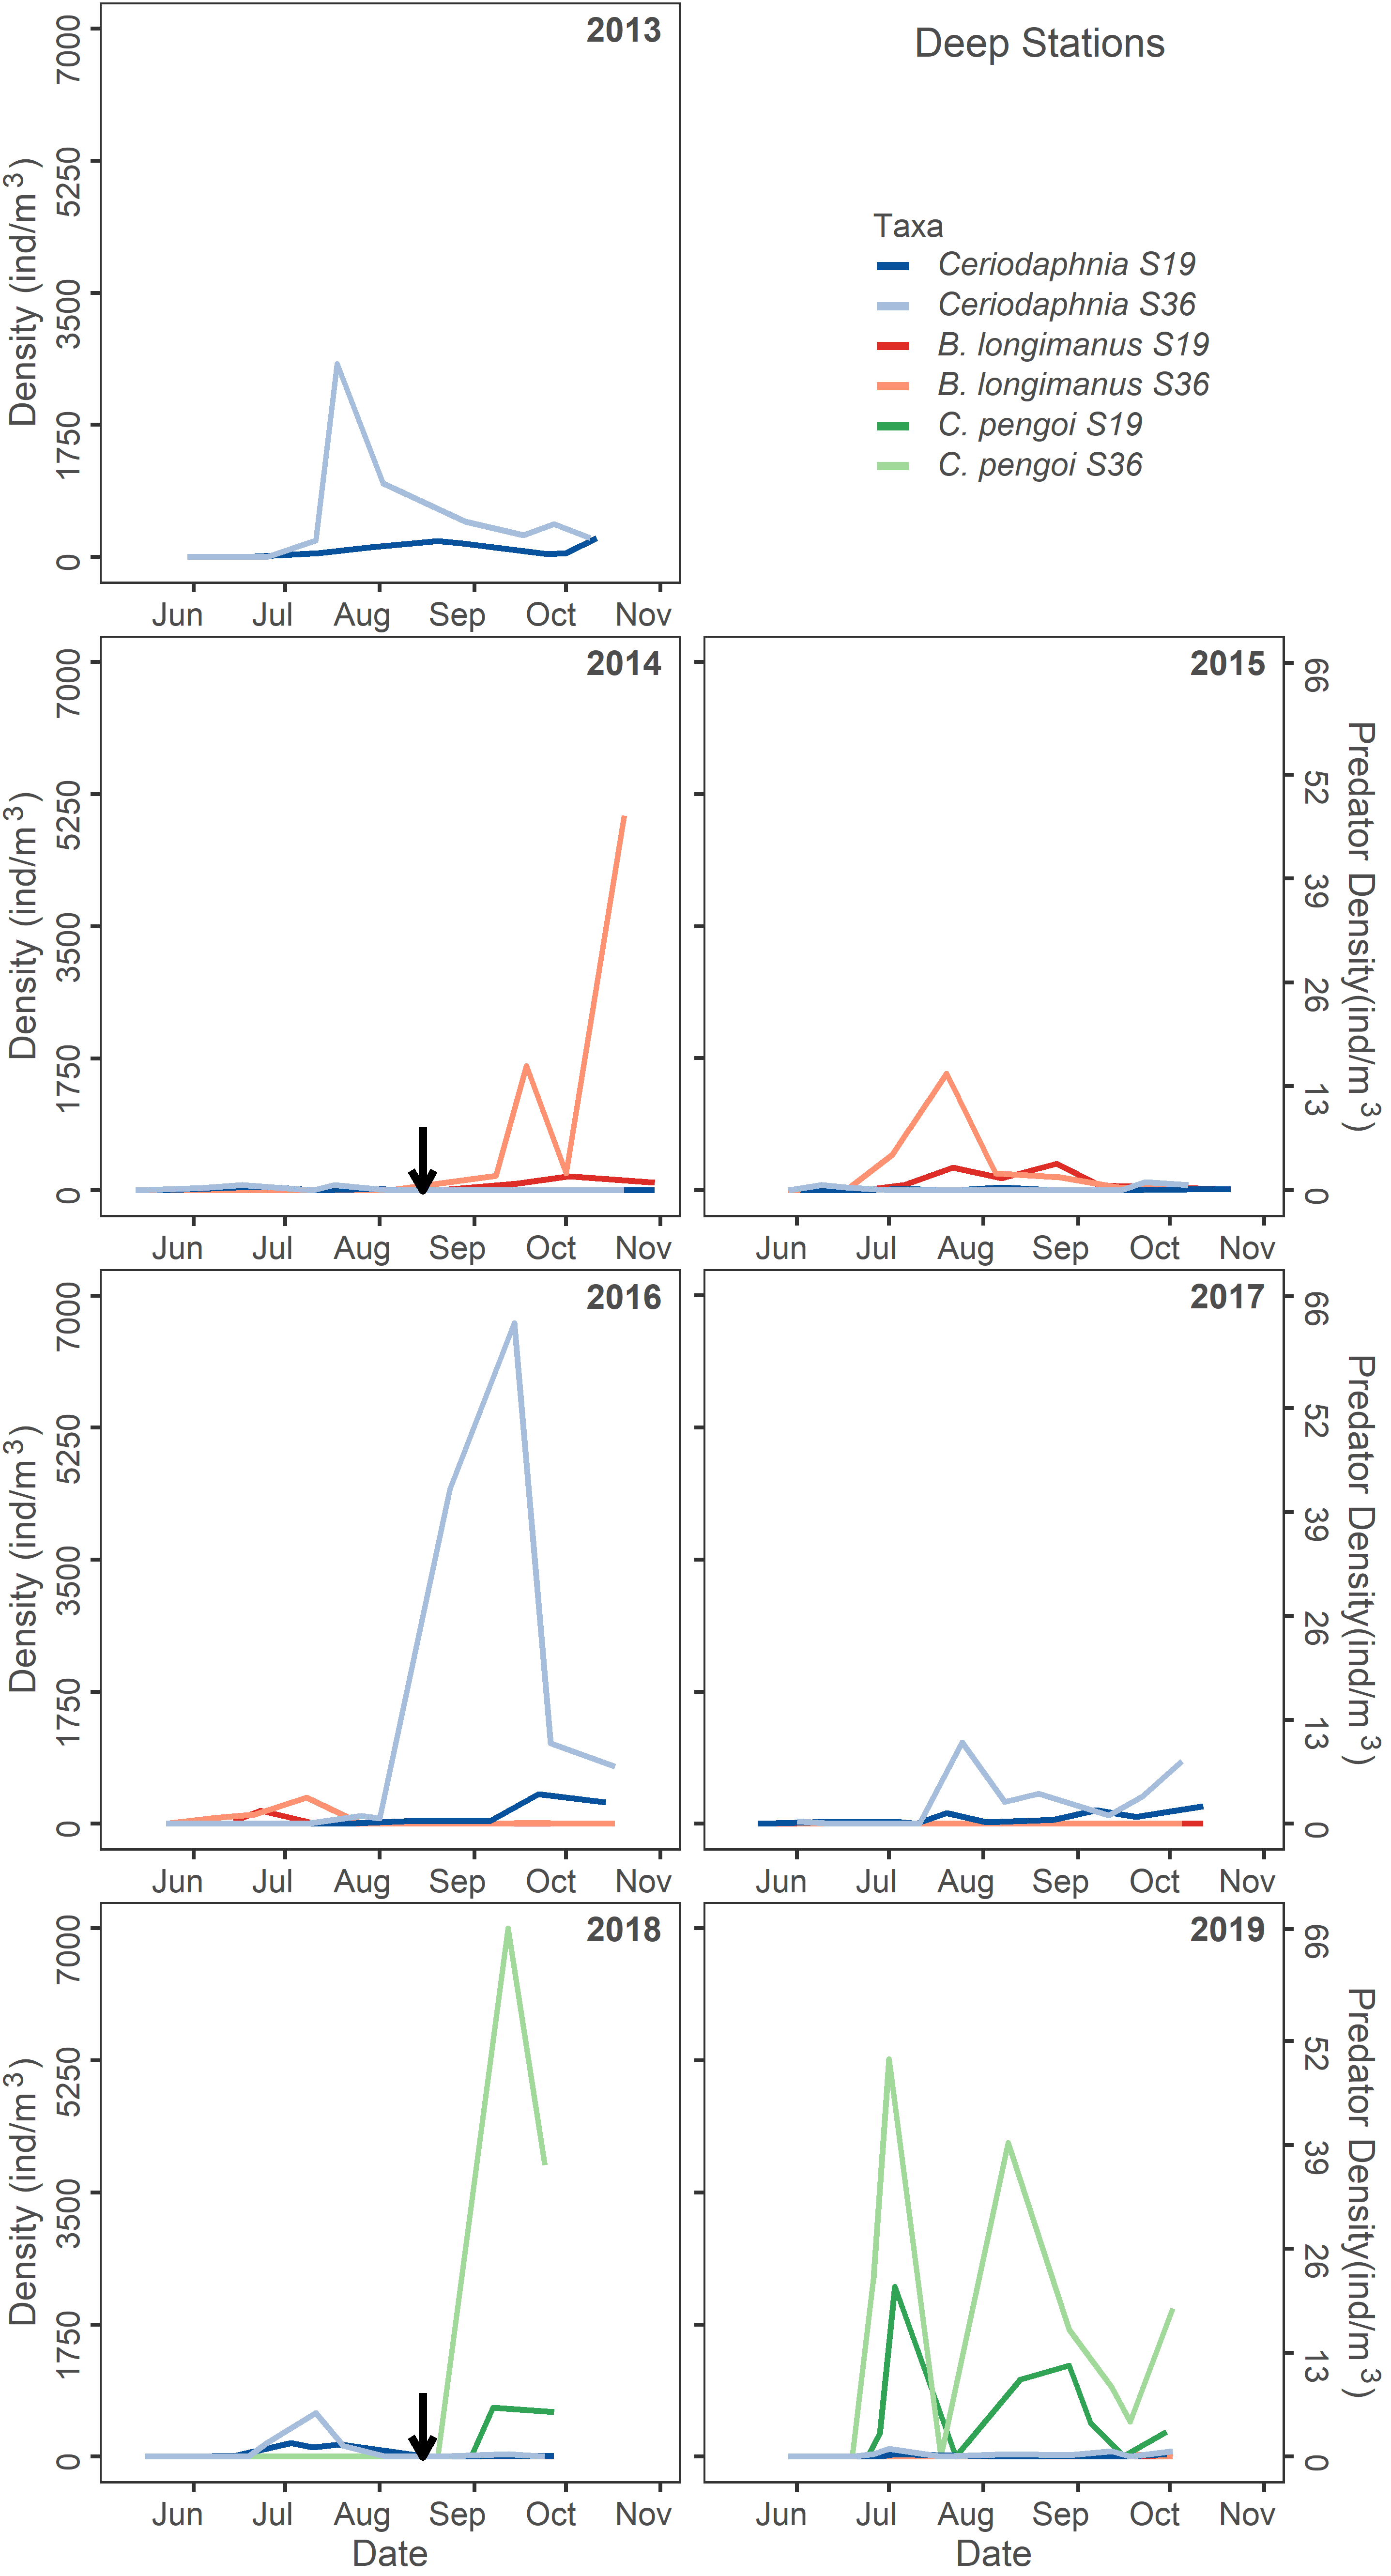

Supplement: s1 [file s1 › Figure S2.tiff]

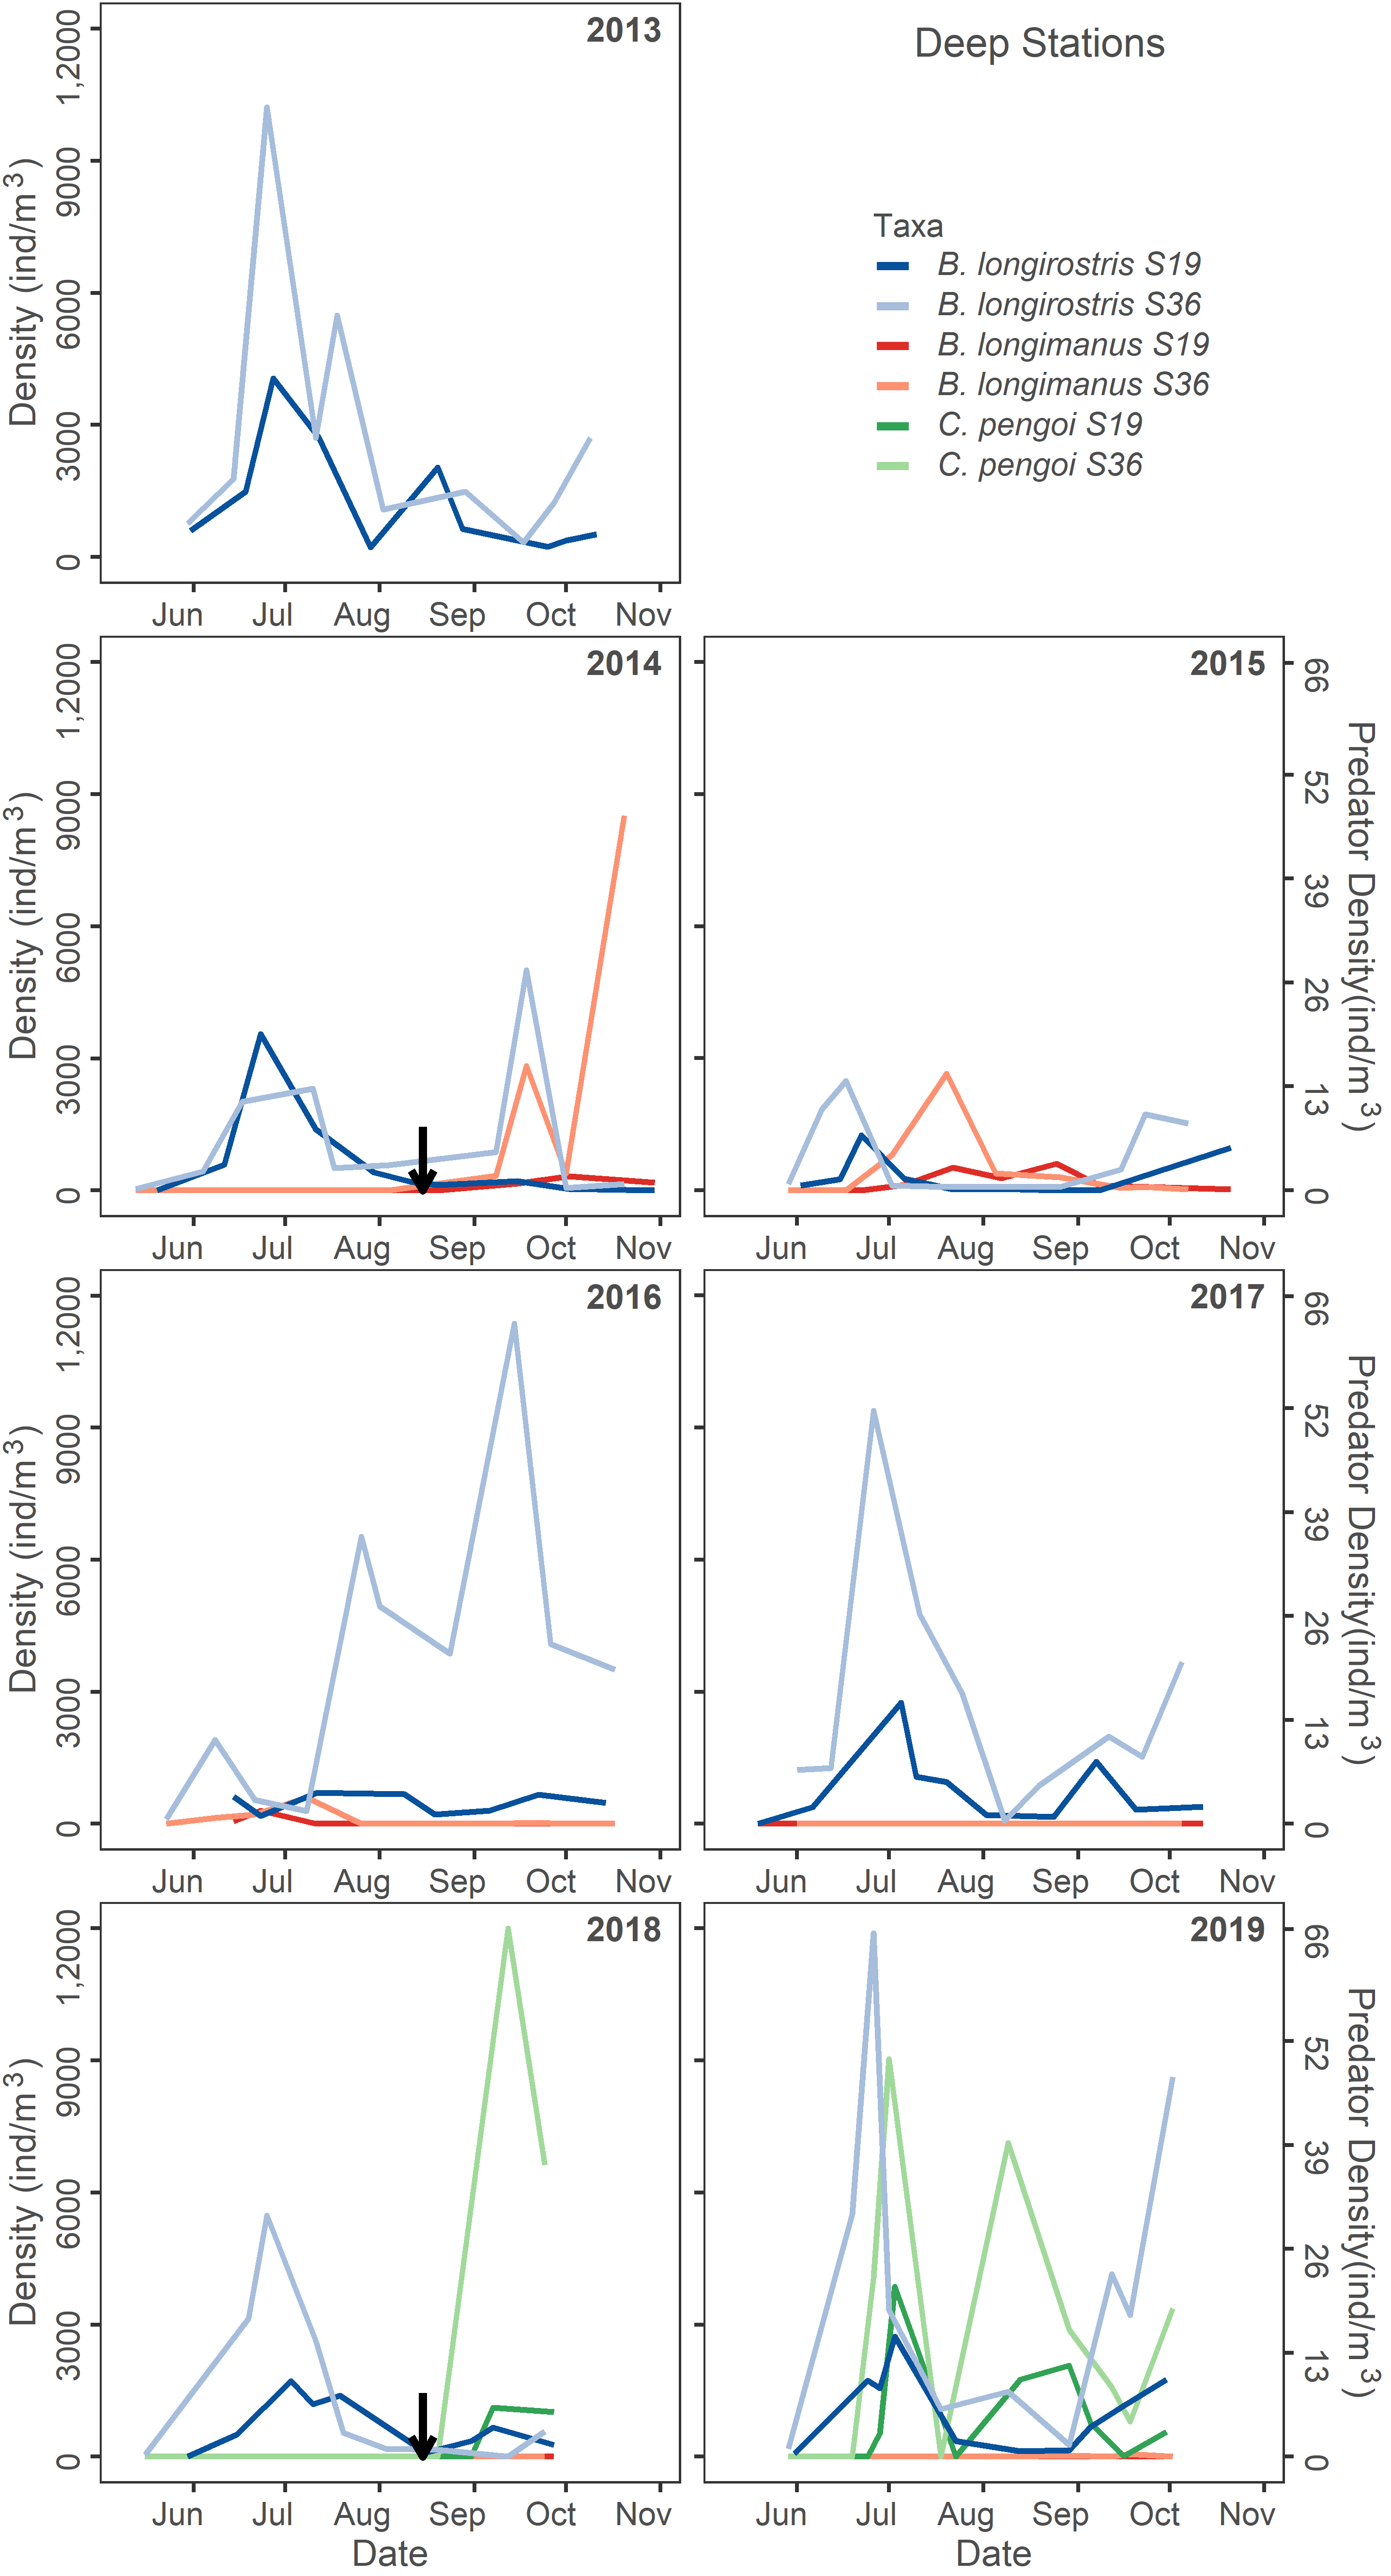

Supplement: s1 [file s1 › Figure S3.tiff]

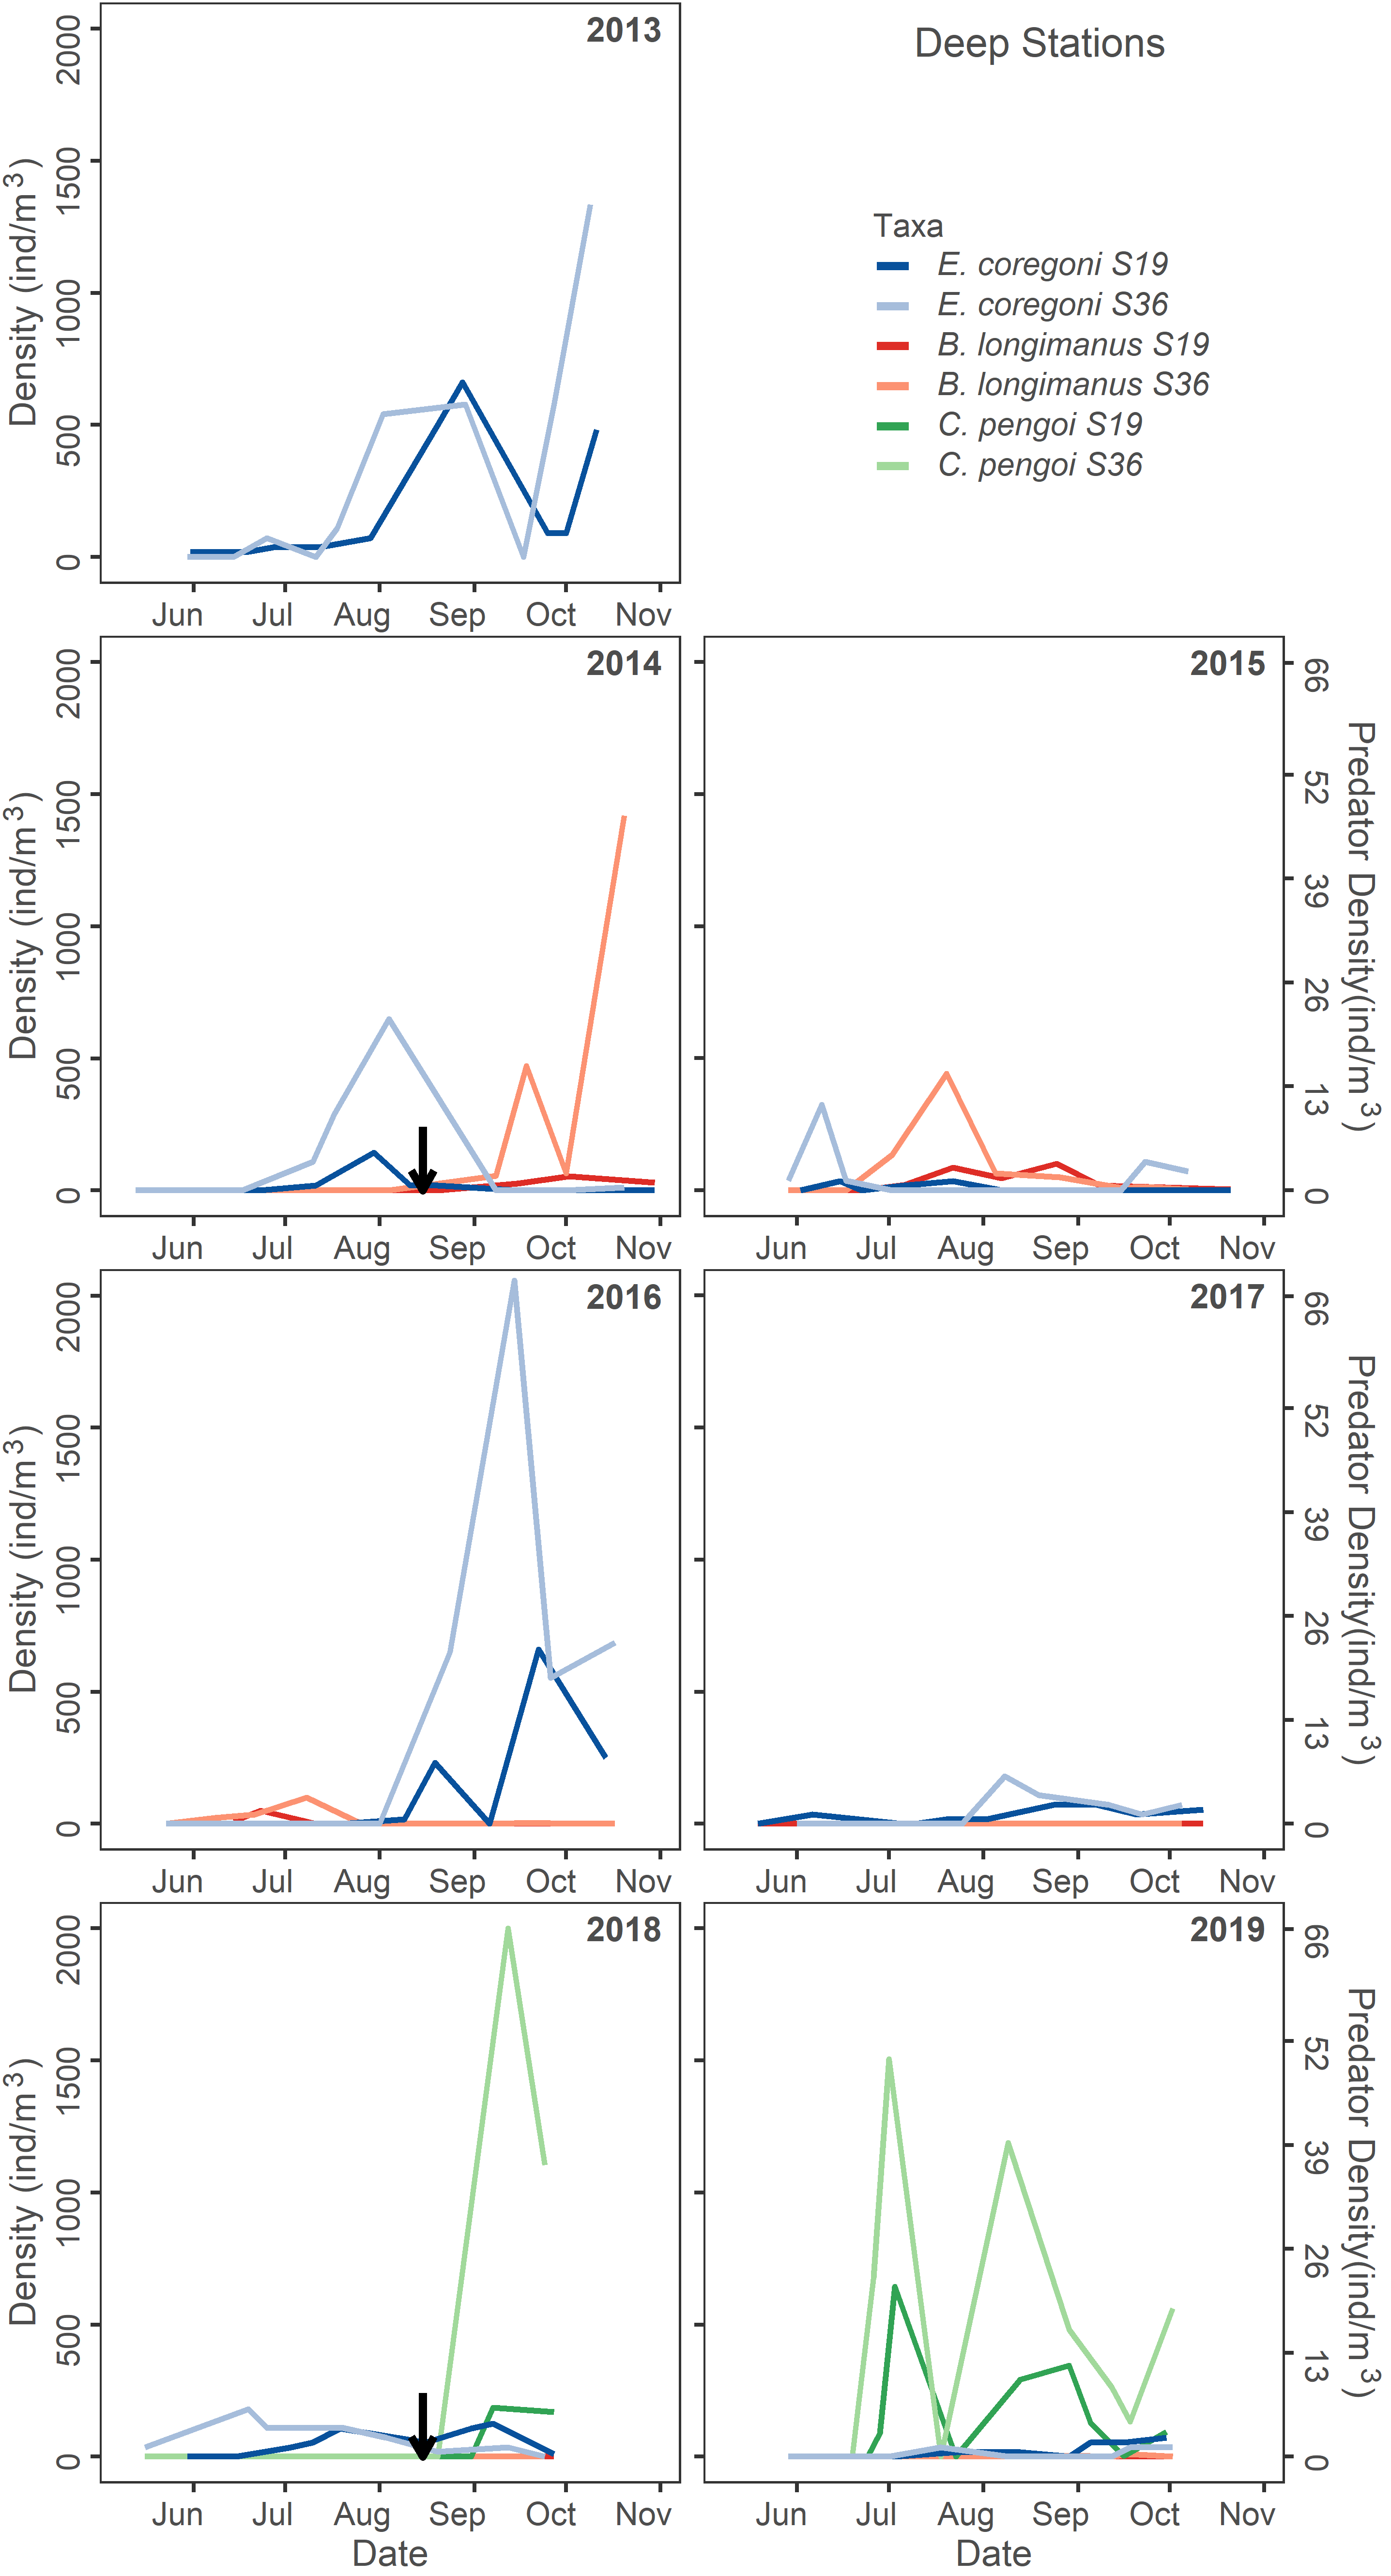

Supplement: s1 [file s1 › Figure S4.tiff]

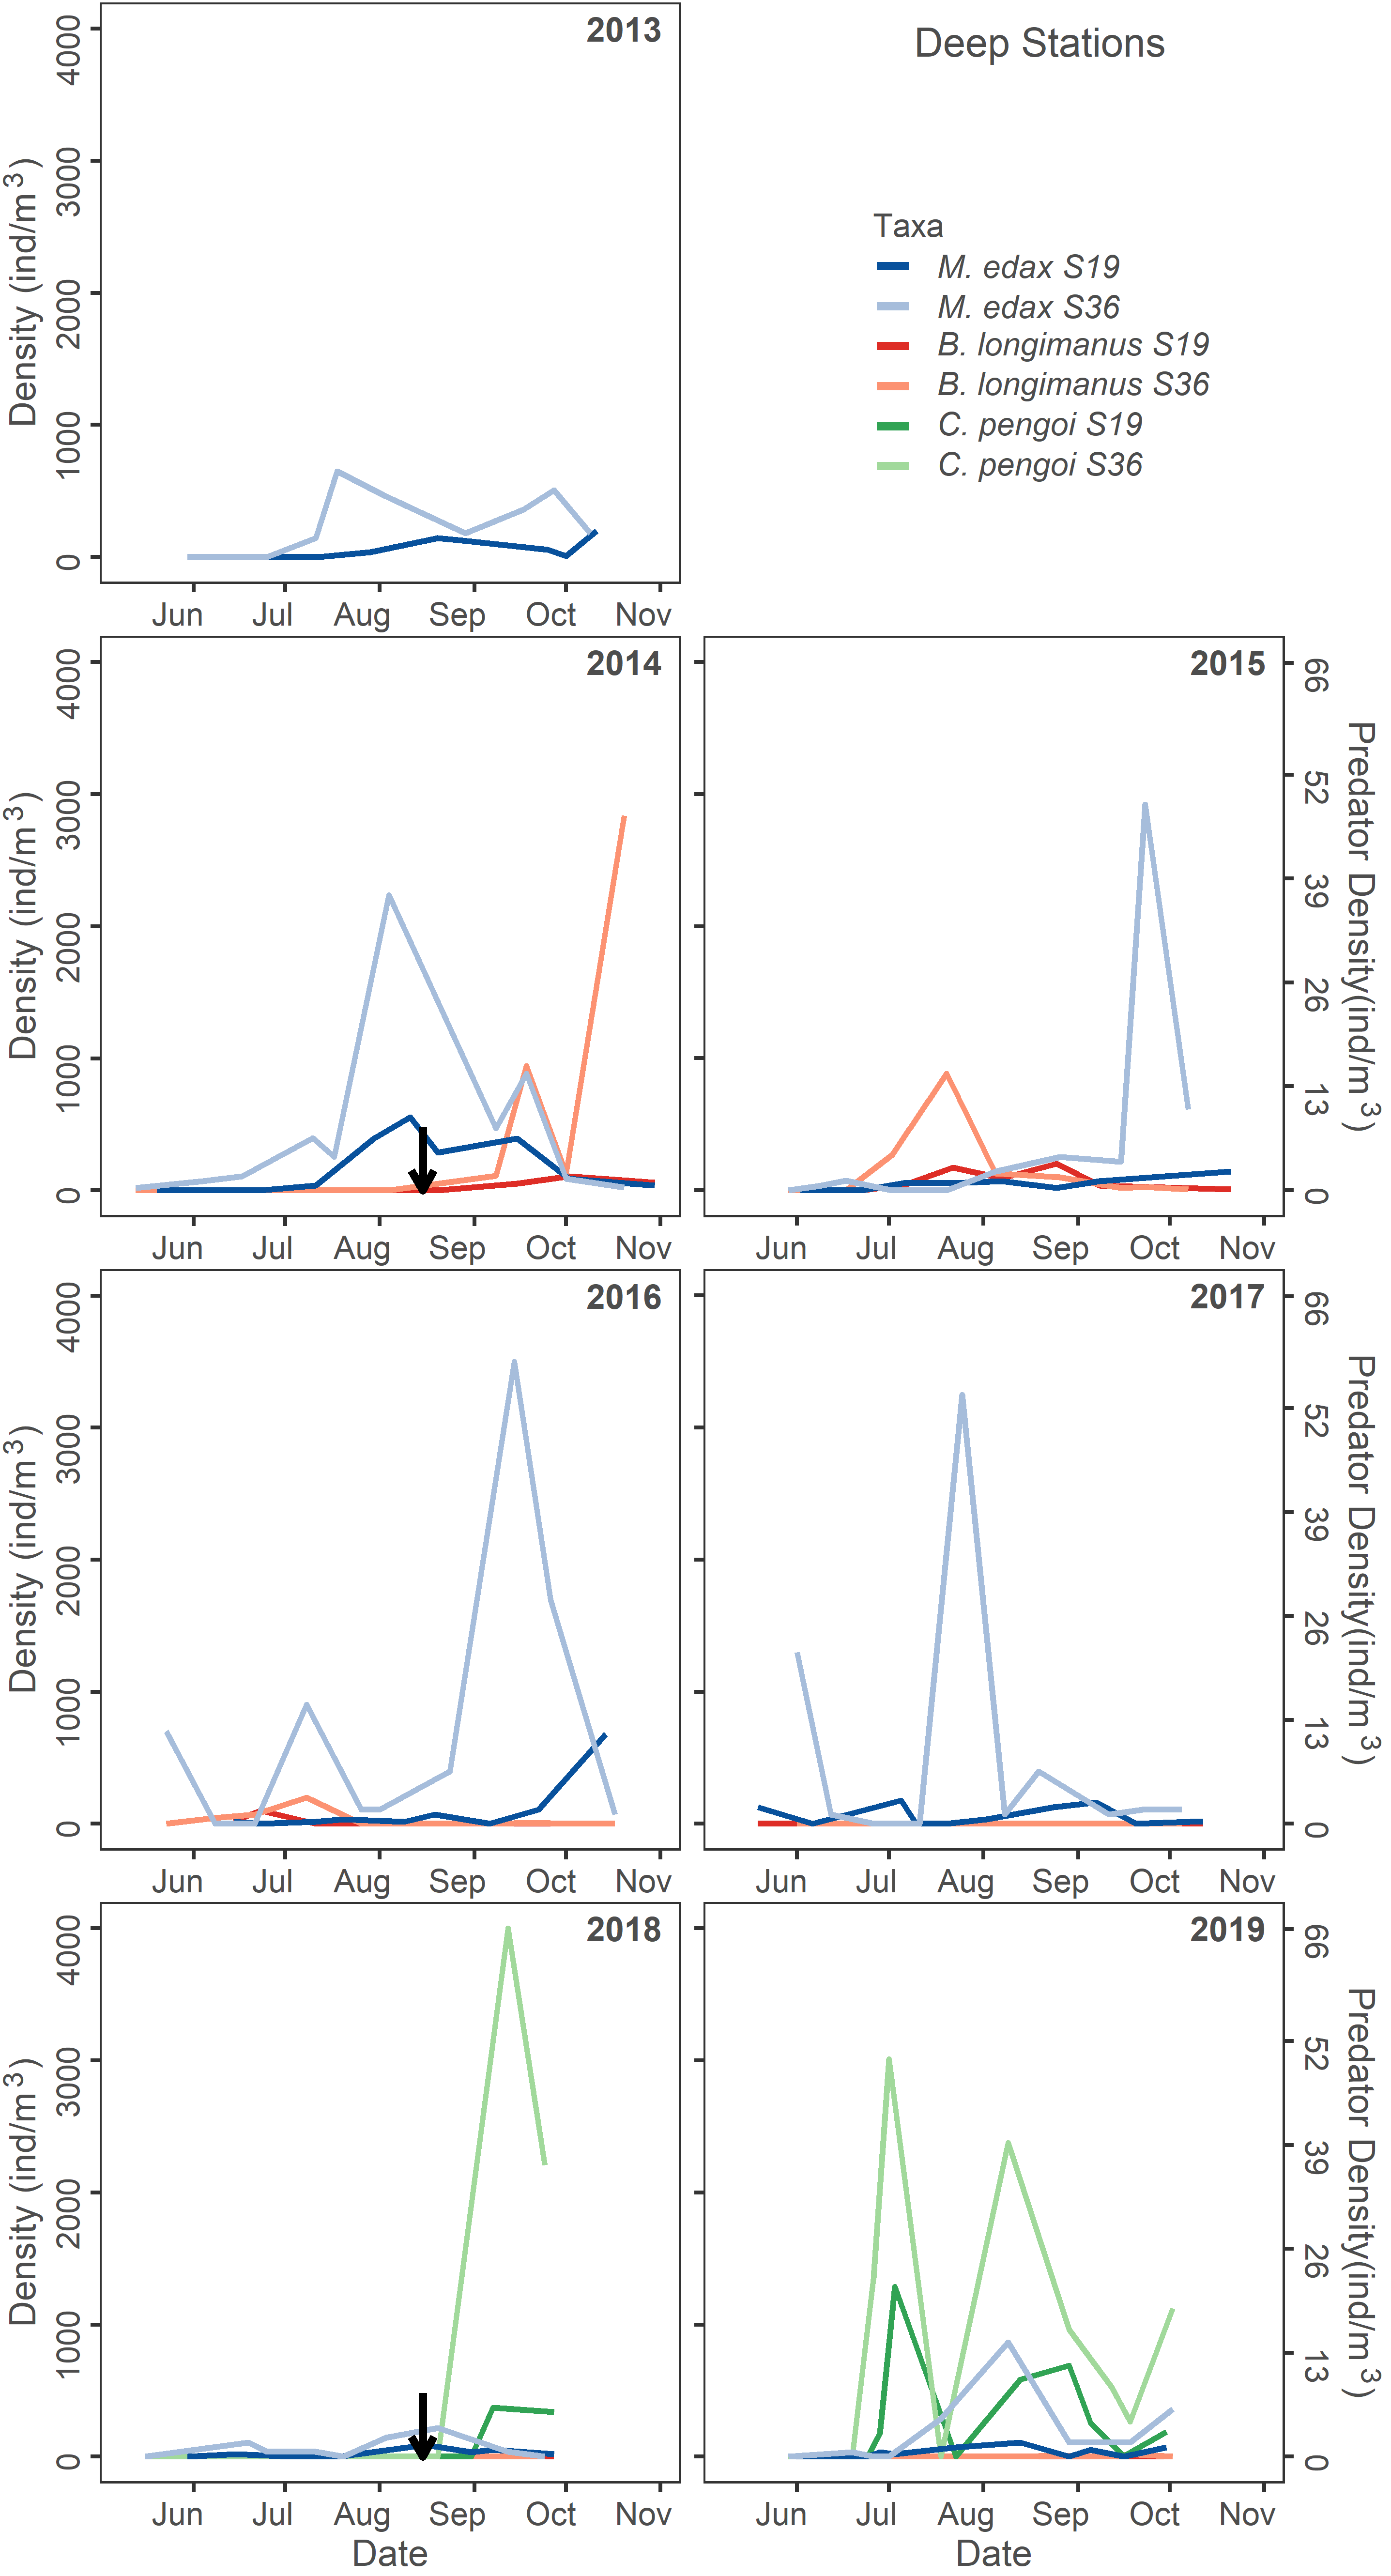

Supplement: s1 [file s1 › Figure S5.tiff]

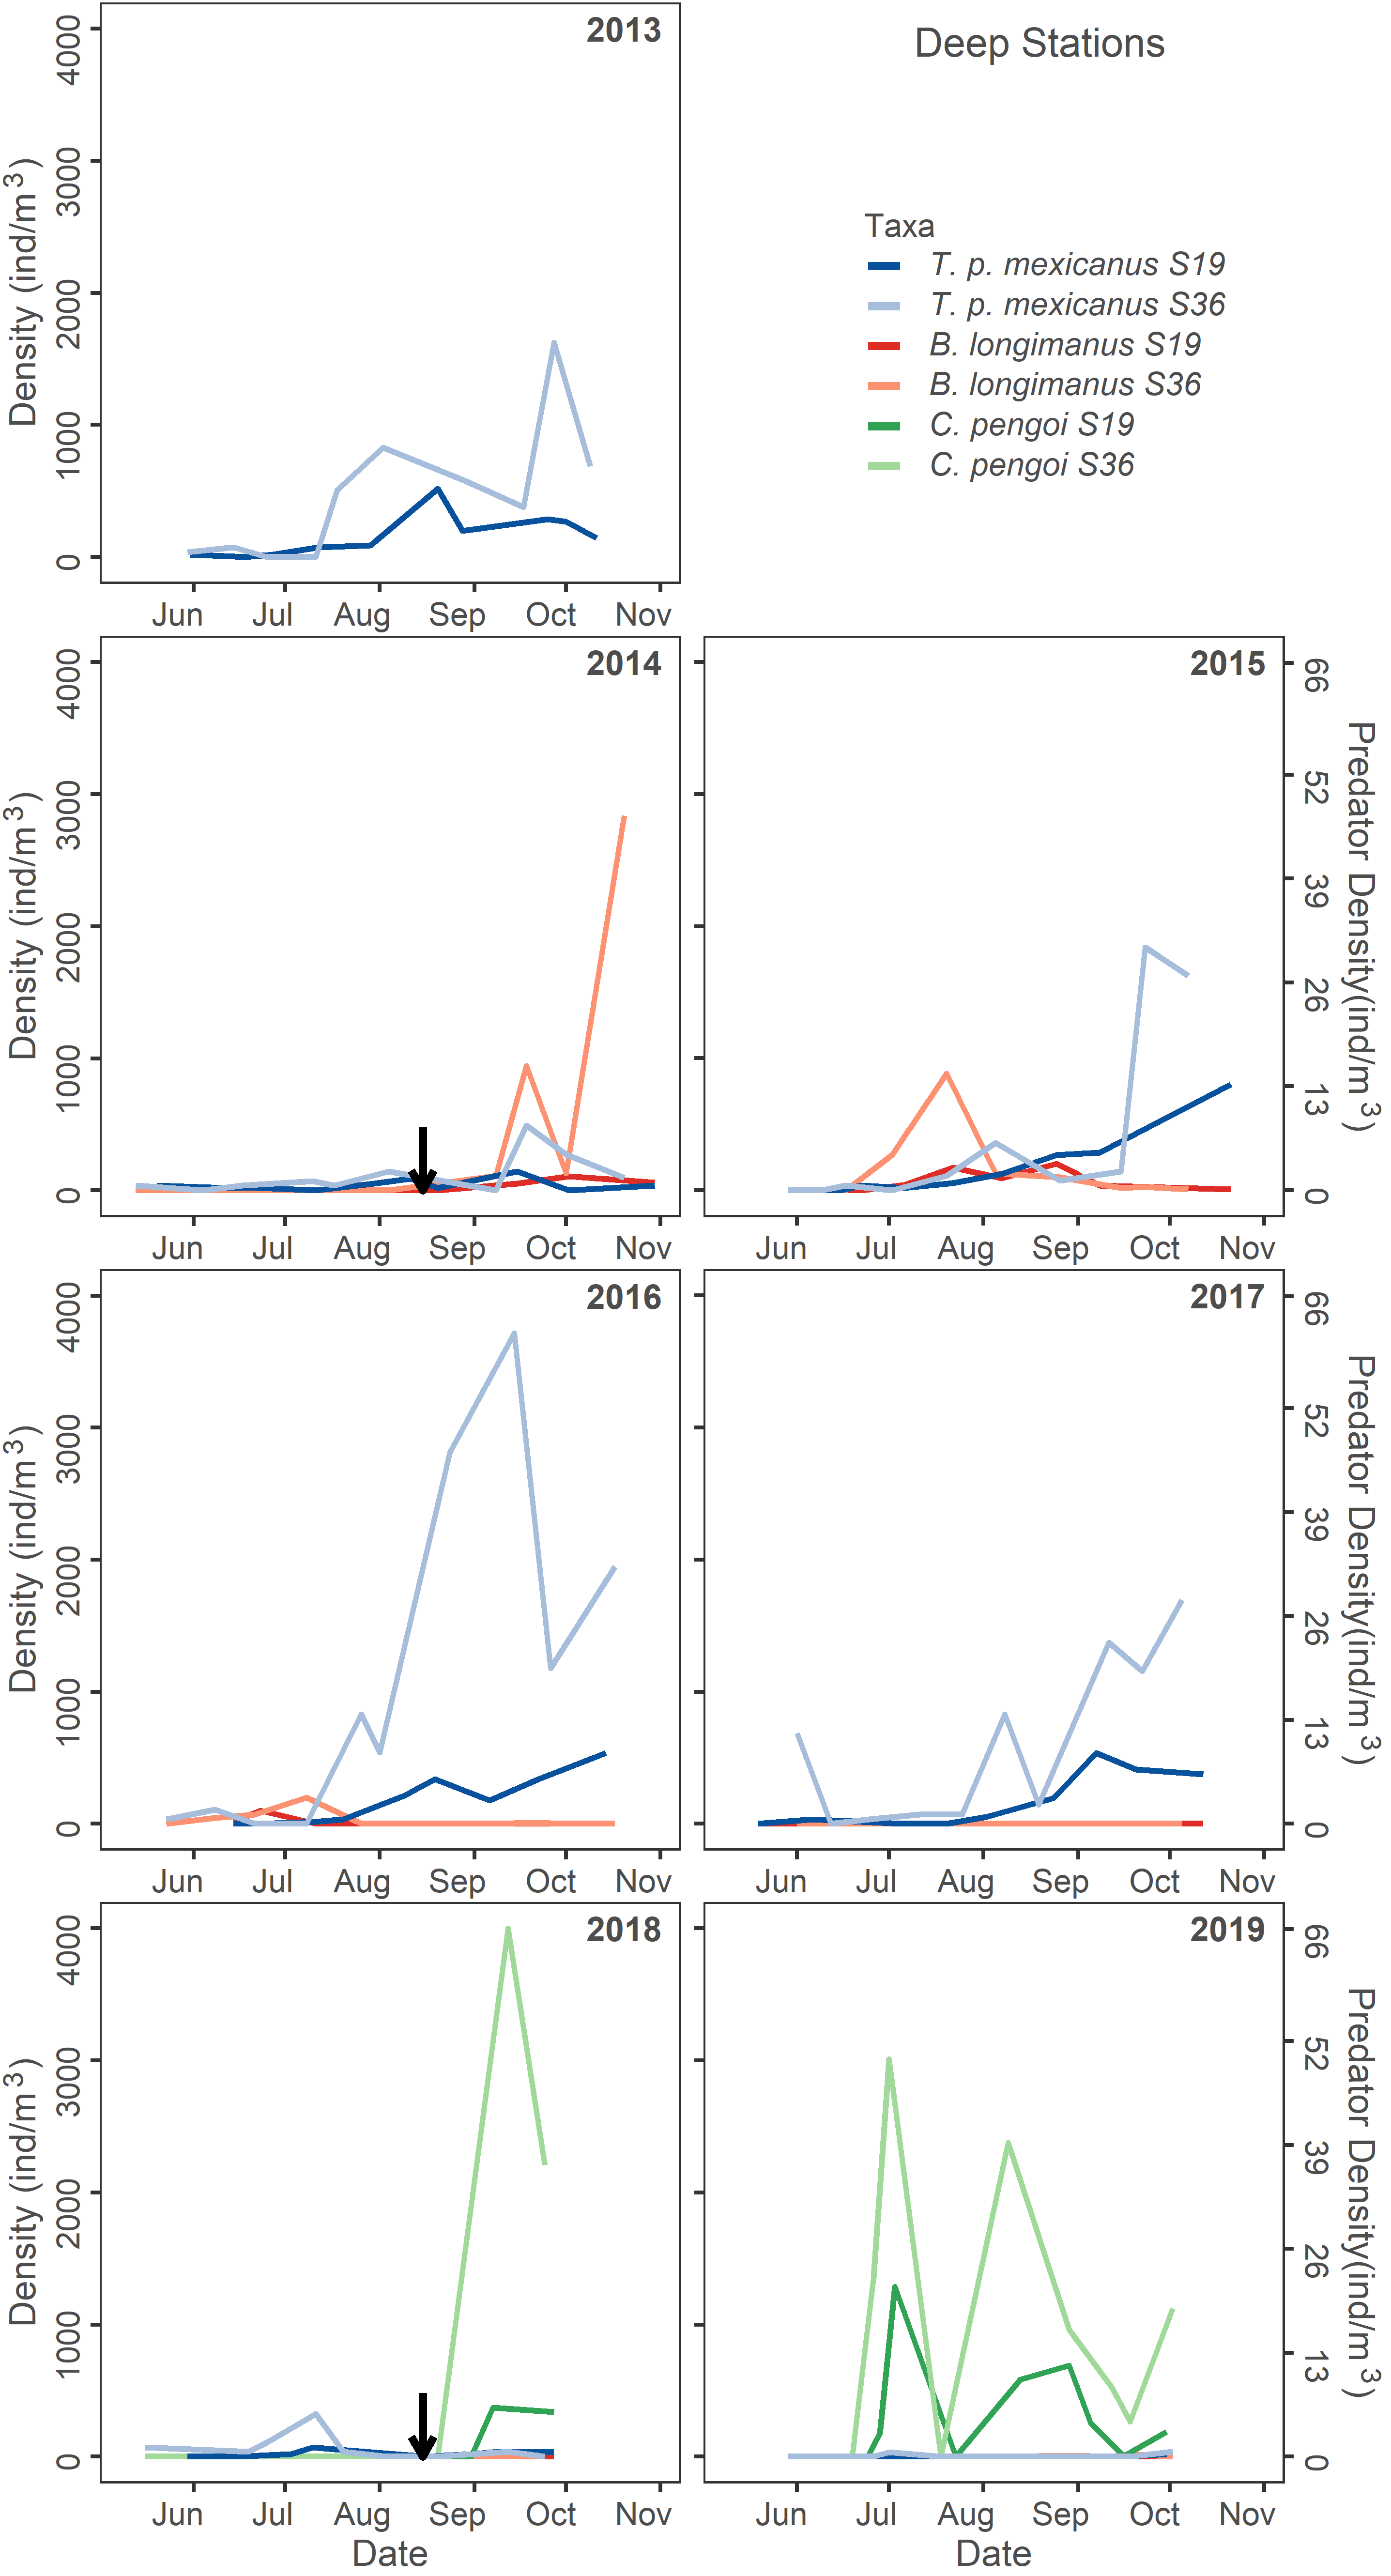

Supplement: s1 [file s1 › Figure S6.tiff]

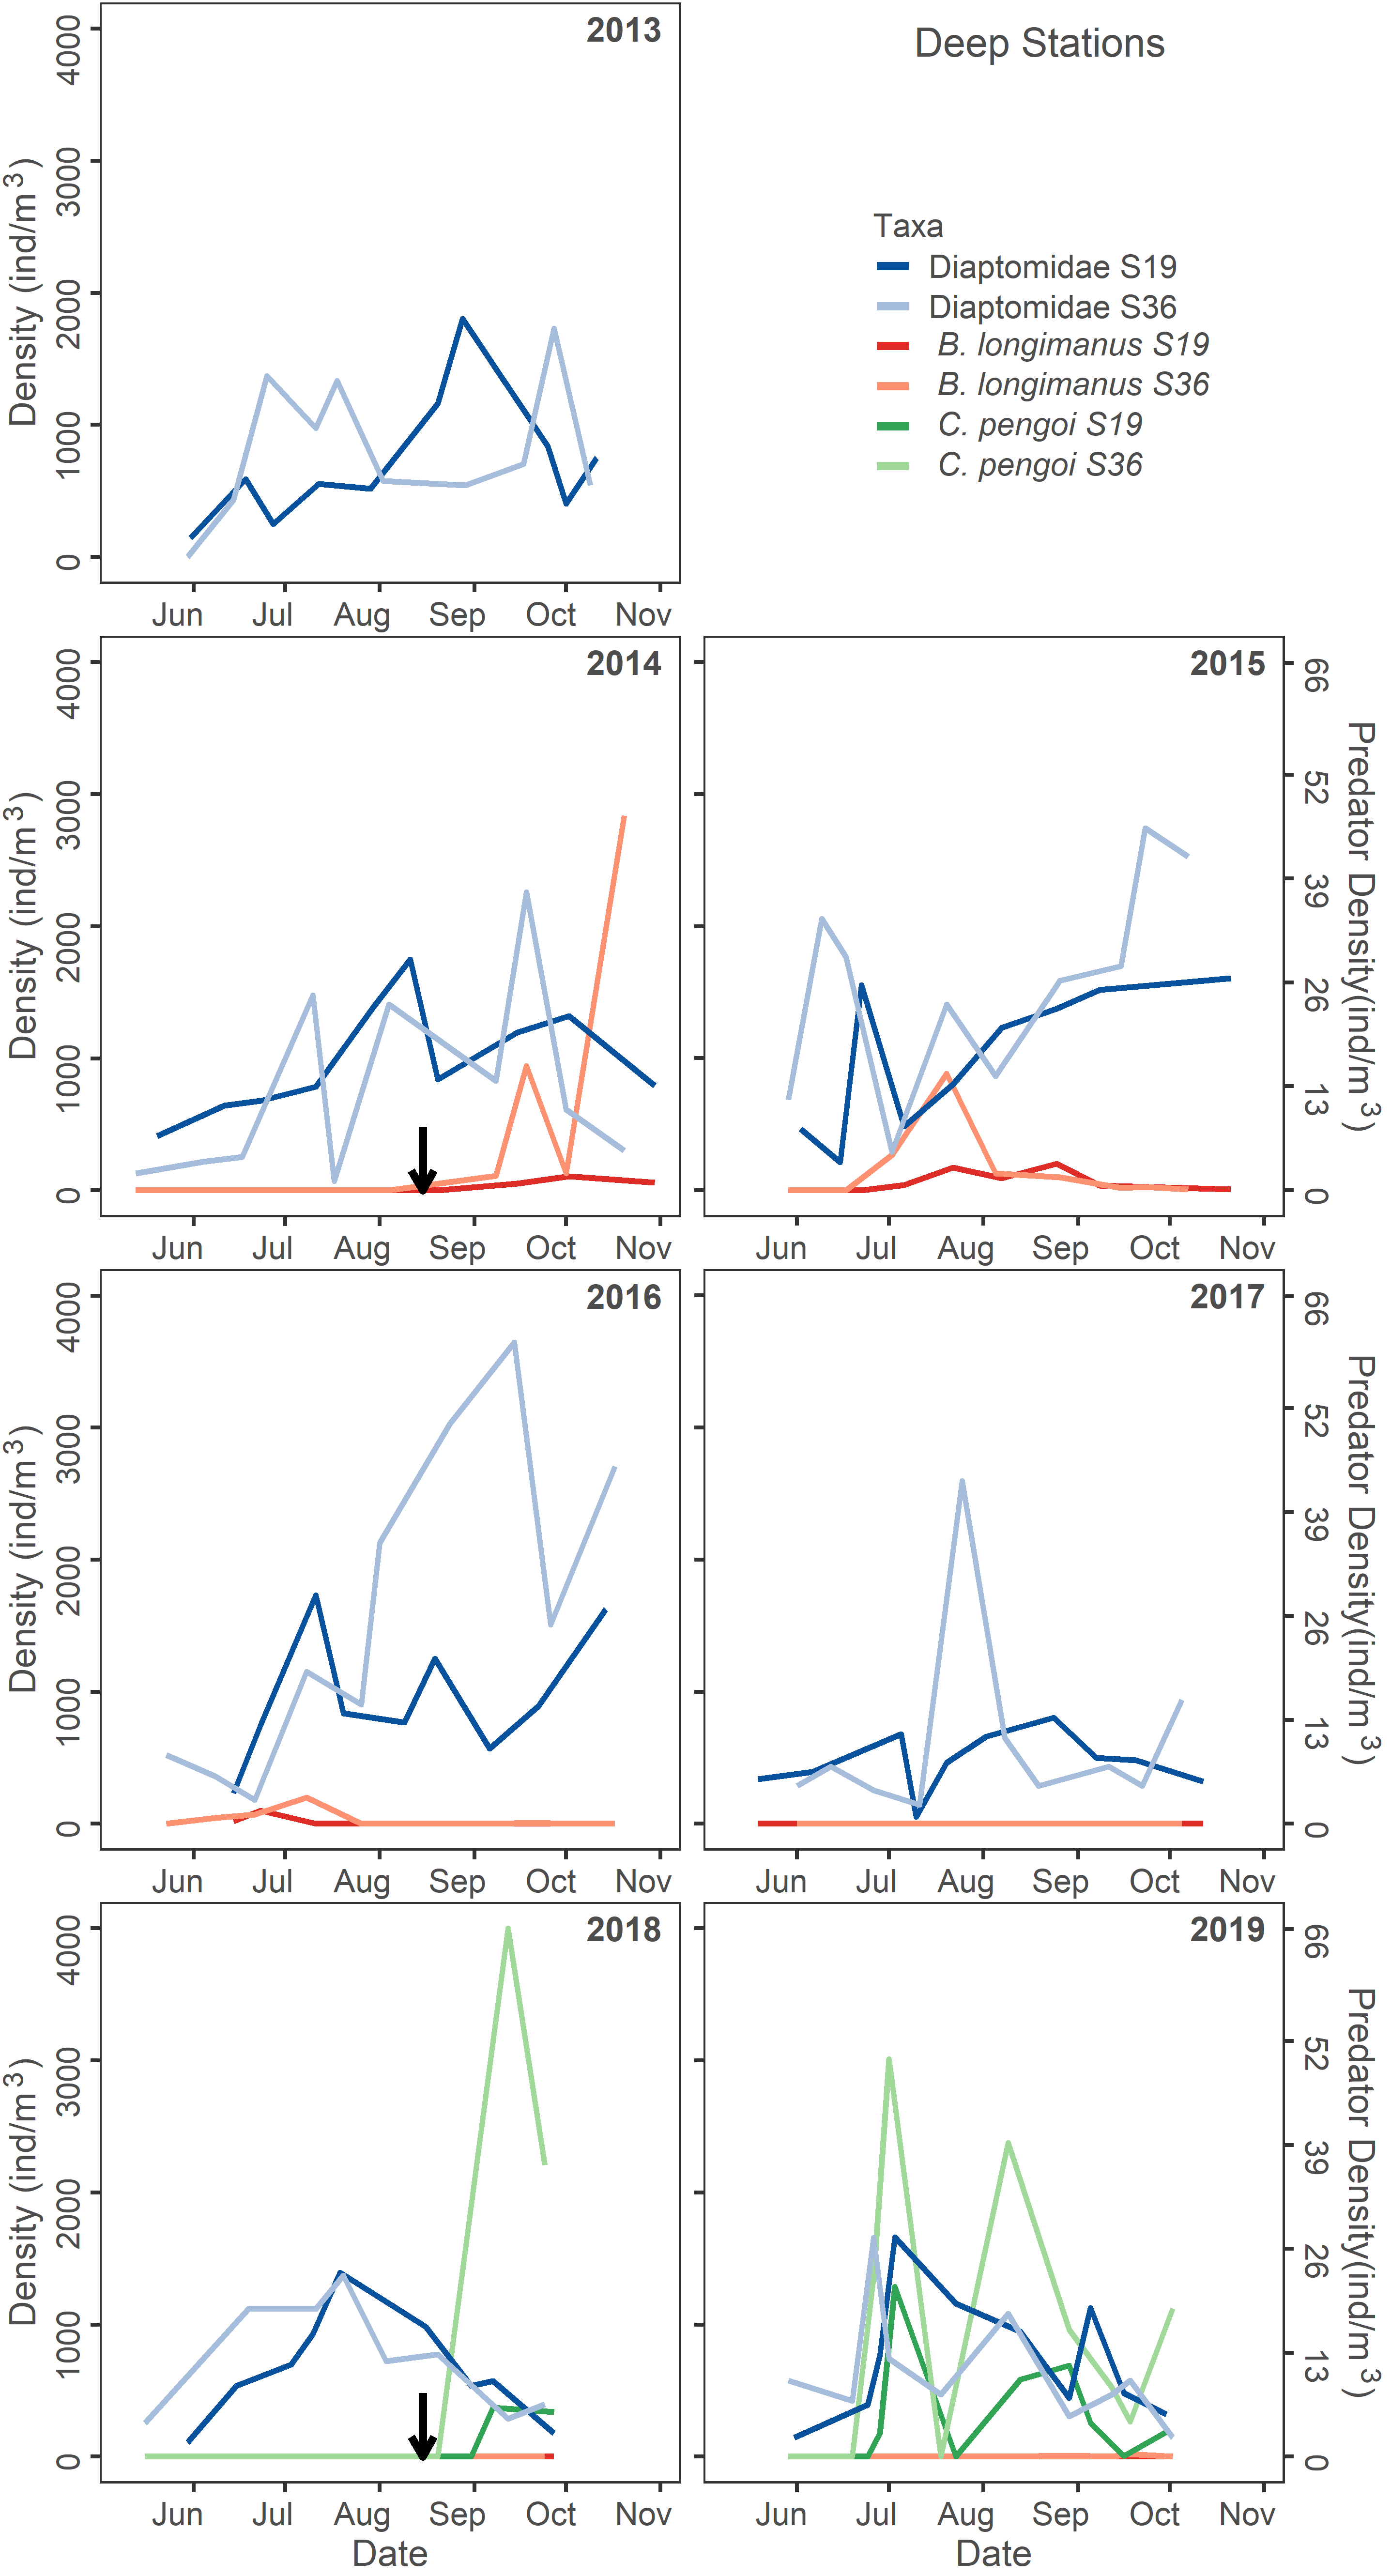

Supplement: s1 [file s1 › Figure S7.tiff]

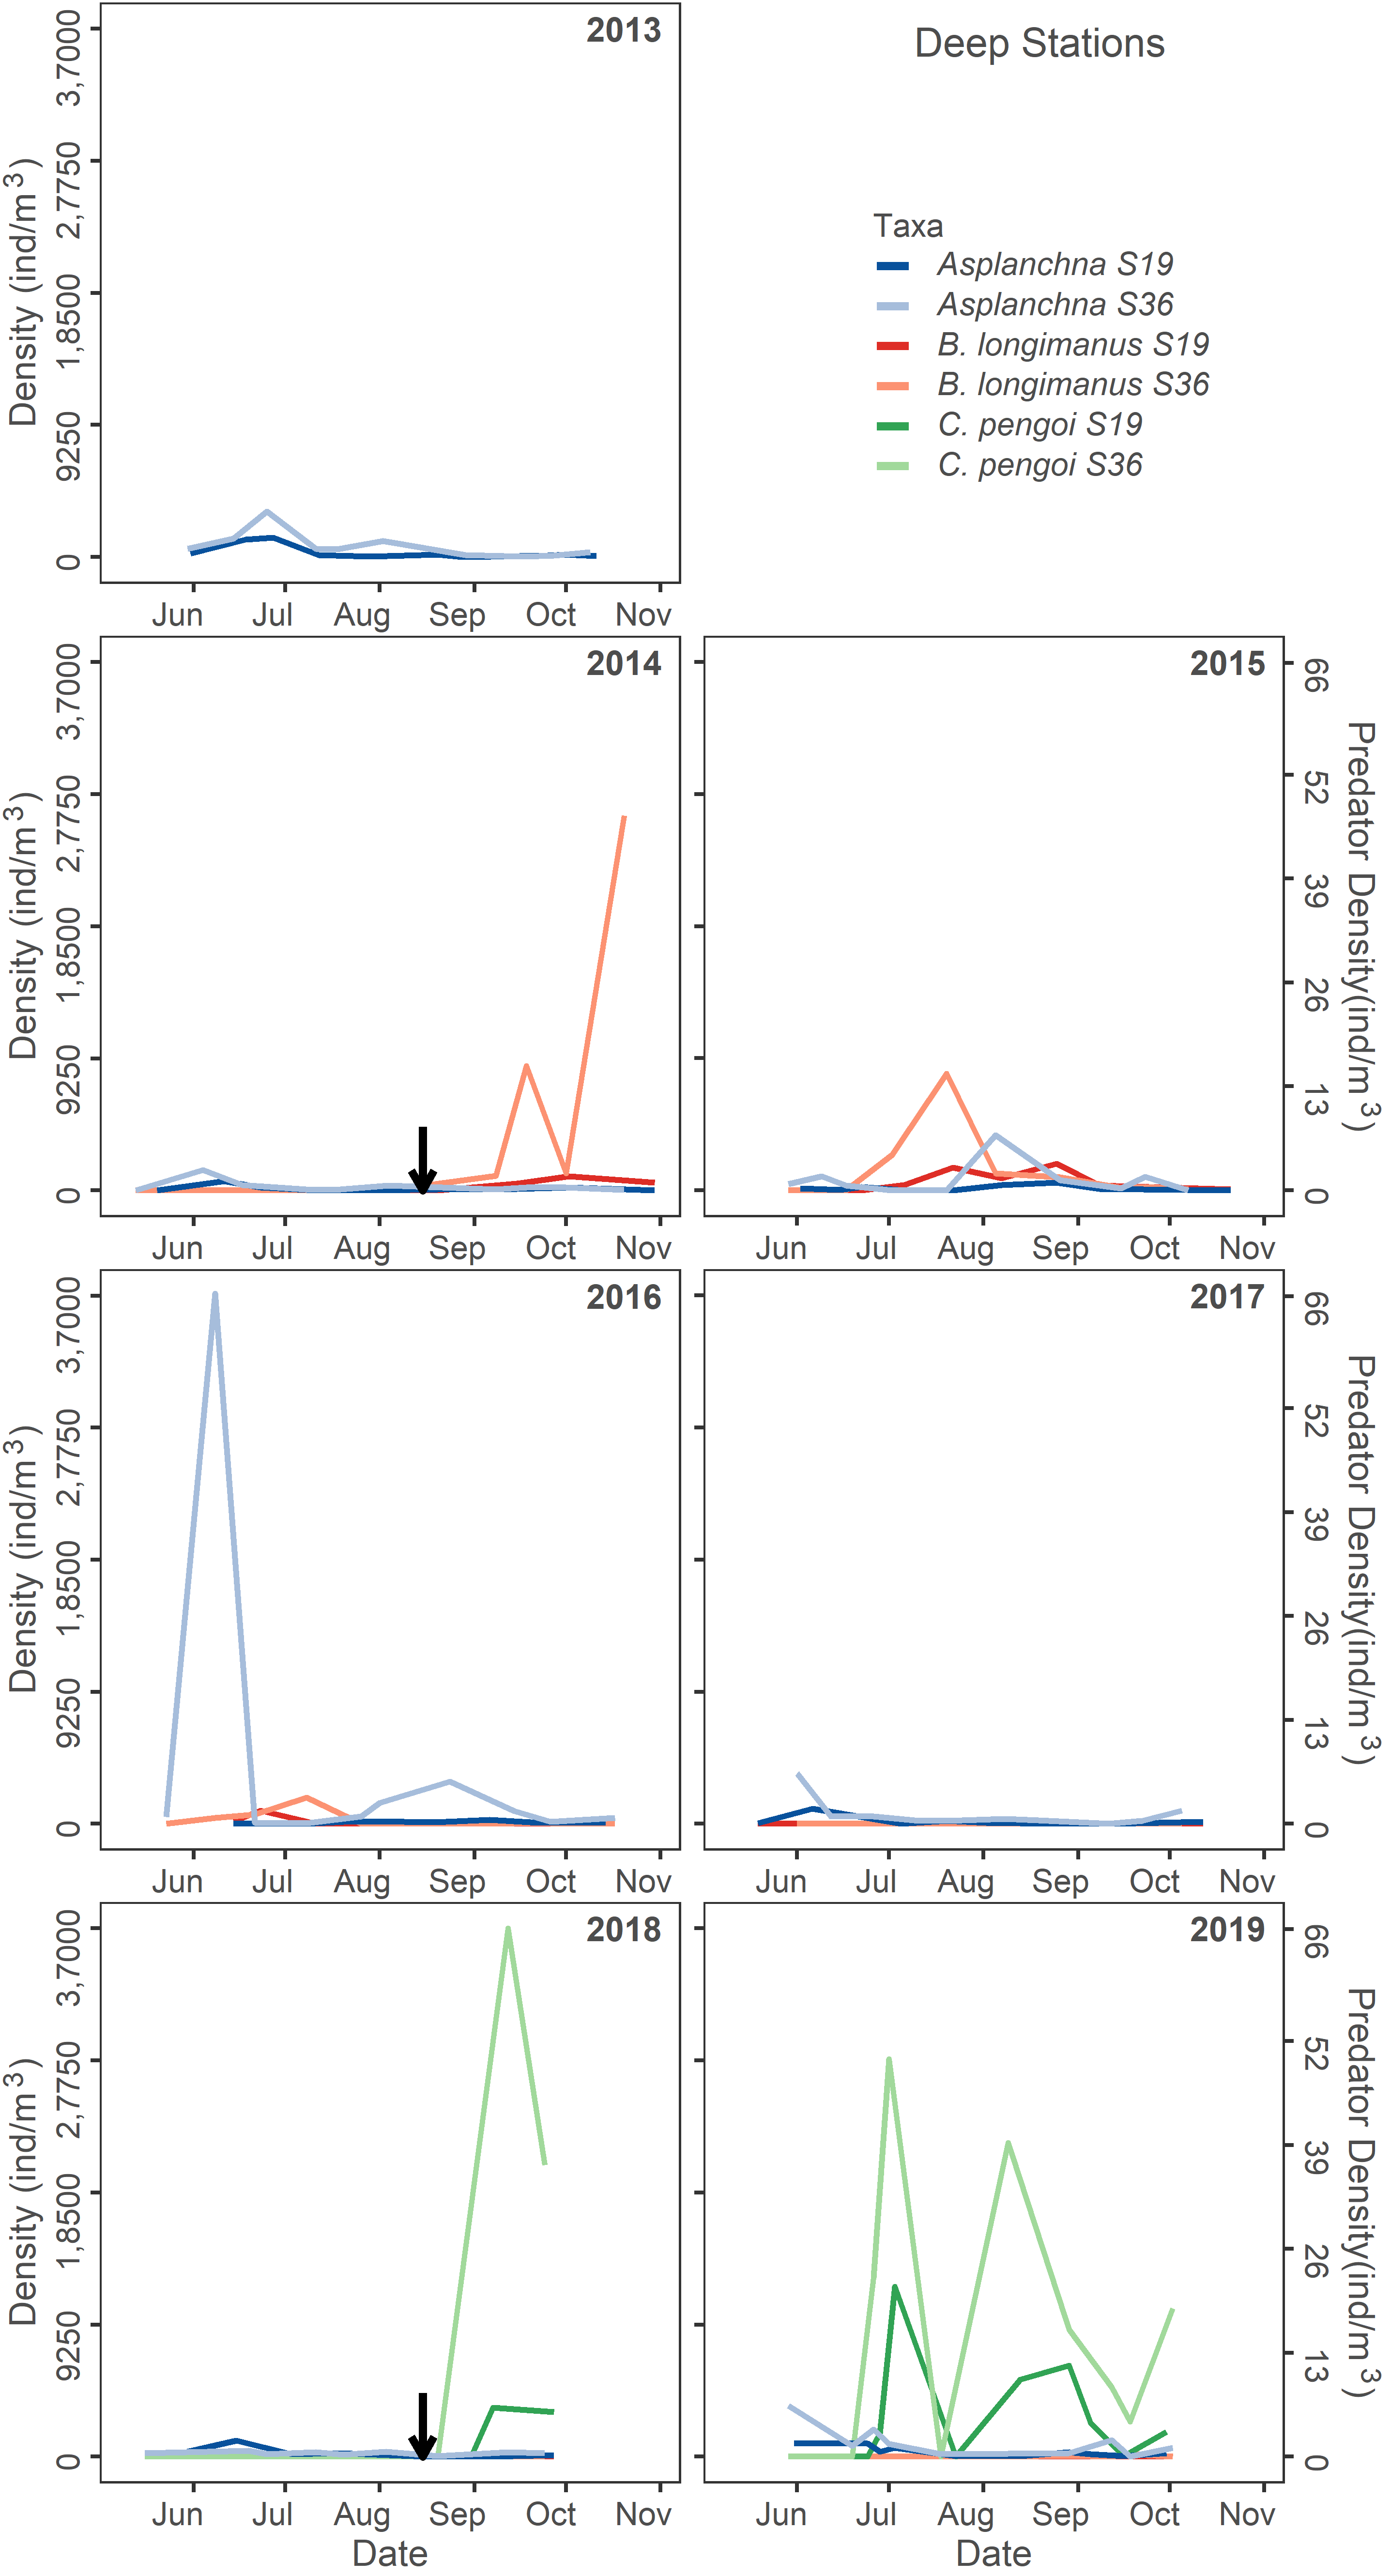

Supplement: s1 [file s1 › Figure S8.tiff]
